# Supplementary material
Source: PubMed Central journal article supplement (PMC10448873)
Supplement: NIHMS1907323-supplement-Supplementary_table_1.pdf [file NIHMS1907323-supplement-Supplementary_table_1.pdf]

# Neural dynamics underlying associative learning in the dorsal and ventral hippocampus

---

In the format provided by the authors and unedited

---

| Figure  | Variable                                                                         | Unit of Comparison                         | n                                                                                                     | Test                                                      | Results                                                        |
|---------|----------------------------------------------------------------------------------|--------------------------------------------|-------------------------------------------------------------------------------------------------------|-----------------------------------------------------------|----------------------------------------------------------------|
| Fig. 1g | odor1/odor2 decoding accuracy, vCA1 vs dCA1                                      | 10 decoding iterations for each region     | n-matched pseudopopulation of 454 cells from 11 vCA1 and 5 dCA1 mice                                  | two-sided Mann-Whitney U                                  | colored-coded bar above graph shows time bins where $p < 0.01$ |
| Fig. 1i | decoding accuracy vs chance                                                      | 10 decoding iterations for each region     | pseudopopulation (see methods) of 454 cells (n-matched in vCA1 and dCA1) from 11 vCA1 and 5 dCA1 mice | two-sided Wilcoxon                                        | color-coded bars above graph show time bins where $p < 0.01$   |
| Fig. 2D | mean lick rate (Hz)                                                              | Trial type (Early session)                 | 16 mice (11 vCA1 and 5 dCA1 mice)                                                                     | two-sided Mann-Whitney U                                  | $U = 75.5$ , $p = 0.13$ , effect-size ( $r$ ) = 0.28           |
| Fig. 2D | mean lick rate (Hz)                                                              | Trial type (Late session)                  | 16 mice (11 vCA1 and 5 dCA1 mice)                                                                     | two-sided Mann-Whitney U                                  | $U = 0$ , $p < 0.0001$ , effect-size ( $r$ ) = 0.85            |
| Fig. 2h | vCA1 vs dCA1 CS+/CS- decoding accuracies during odor period (Pre session)        | 10 decoding iterations for each region     | n-matched pseudopopulation of 454 cells from 11 vCA1 and 4 dCA1 mice                                  | two-sided Mann-Whitney U                                  | $U = 0$ , $p = 0.00018$ , effect-size ( $r$ ) = 0.85           |
| Fig. 2h | vCA1 vs dCA1 CS+/CS- decoding accuracies during odor period (Late session)       | 10 decoding iterations for each region     | n-matched pseudopopulation of 454 cells from 11 vCA1 and 5 dCA1 mice                                  | two-sided Mann-Whitney U                                  | $U = 44$ , $p = 0.68$ , effect-size ( $r$ ) = 0.10             |
| Fig. 2h | vCA1 vs dCA1 CS+/CS- decoding accuracies during trace period (Pre session)       | 10 decoding iterations for each region     | n-matched pseudopopulation of 454 cells from 11 vCA1 and 4 dCA1 mice                                  | two-sided Mann-Whitney U                                  | $U = 25$ , $p = 0.064$ , effect-size ( $r$ ) = 0.42            |
| Fig. 2h | vCA1 vs dCA1 CS+/CS- decoding accuracies during trace period (Late session)      | 10 decoding iterations for each region     | n-matched pseudopopulation of 454 cells from 11 vCA1 and 5 dCA1 mice                                  | two-sided Mann-Whitney U                                  | $U = 32$ , $p = 0.18$ , effect-size ( $r$ ) = 0.30             |
| Fig. 2i | CS+/baseline vs CS-/baseline decoding accuracies, vCA1 or dCA1                   | 10 decoding iterations for each trial type | n-matched pseudopopulation of 454 cells from 11 vCA1 or 5 dCA1 mice                                   | two-sided Mann-Whitney U                                  | color-coded bars above graph show time bins where $p < 0.01$   |
| Fig. 2j | vCA1 vs dCA1 CS+/baseline decoding accuracies during odor period (Pre session)   | 10 decoding iterations for each region     | n-matched pseudopopulation of 454 cells from 11 vCA1 and 4 dCA1 mice                                  | two-sided Mann-Whitney U                                  | $U = 0$ , $p = 0.00017$ , effect-size ( $r$ ) = 0.85           |
| Fig. 2j | vCA1 vs dCA1 CS+/baseline decoding accuracies during odor period (Late session)  | 10 decoding iterations for each region     | n-matched pseudopopulation of 454 cells from 11 vCA1 and 5 dCA1 mice                                  | two-sided Mann-Whitney U                                  | $U = 69.5$ , $p = 0.15$ , effect-size ( $r$ ) = 0.33           |
| Fig. 2j | vCA1 vs dCA1 CS+/baseline decoding accuracies during trace period (Pre session)  | 10 decoding iterations for each region     | n-matched pseudopopulation of 454 cells from 11 vCA1 and 4 dCA1 mice                                  | two-sided Mann-Whitney U                                  | $U = 25.5$ , $p = 0.069$ , effect-size ( $r$ ) = 0.41          |
| Fig. 2j | vCA1 vs dCA1 CS+/baseline decoding accuracies during trace period (Late session) | 10 decoding iterations for each region     | n-matched pseudopopulation of 454 cells from 11 vCA1 and 5 dCA1 mice                                  | two-sided Mann-Whitney U                                  | $U = 56$ , $p = 0.68$ , effect-size ( $r$ ) = 0.10             |
| Fig. 2k | odor period vs trace period decoding accuracy vs chance                          | 10 decoding iterations                     | pseudopopulation of 454 cells from 11 vCA1 mice                                                       | two-sided Wilcoxon                                        | $W = 0$ , $p = 0.005$ , effect-size ( $r$ ) = 0.85             |
| Fig. 2k | odor period vs trace period decoding accuracy vs chance                          | 10 decoding iterations                     | pseudopopulation of 454 cells from 5 dCA1 mice                                                        | two-sided Wilcoxon                                        | $W = 0$ , $p = 0.005$ , effect-size ( $r$ ) = 0.85             |
| Fig. 3e | Early vs Late CS+/CS- decoding accuracies during odor period (vCA1)              | 10 decoding iterations for each            | n-matched pseudopopulation of 454 cells from 11 vCA1 mice                                             | two-sided Mann-Whitney U, Bonferroni correction for $n=3$ | $U = 0$ , $p < 0.001$ , effect-size ( $r$ ) = 0.85             |
| Fig. 3e | Early vs Ext CS+/CS- decoding accuracies during odor period (vCA1)               | 10 decoding iterations for each            | n-matched pseudopopulation of 454 cells from 11 vCA1 mice                                             | two-sided Mann-Whitney U, Bonferroni correction for $n=3$ | $U = 83.5$ , $p = 0.038$ , effect-size ( $r$ ) = 0.57          |
| Fig. 3e | Early vs Reacq CS+/CS- decoding accuracies during odor period (vCA1)             | 10 decoding iterations for each            | n-matched pseudopopulation of 454 cells from 11 vCA1 mice                                             | two-sided Mann-Whitney U, Bonferroni correction for $n=3$ | $U = 13.5$ , $p = 0.019$ , effect-size ( $r$ ) = 0.62          |
| Fig. 3e | Late vs Ext CS+/CS- decoding accuracies during odor period (vCA1)                | 10 decoding iterations for each            | n-matched pseudopopulation of 454 cells from 11 vCA1 mice                                             | two-sided Mann-Whitney U, Bonferroni correction for $n=3$ | $U = 100$ , $p < 0.001$ , effect-size ( $r$ ) = 0.85           |
| Fig. 3e | Late vs Reacq CS+/CS- decoding accuracies during odor period (vCA1)              | 10 decoding iterations for each            | n-matched pseudopopulation of 454 cells from 11 vCA1 mice                                             | two-sided Mann-Whitney U, Bonferroni correction for $n=3$ | $U = 99$ , $p < 0.001$ , effect-size ( $r$ ) = 0.83            |
| Fig. 3e | Ext vs Reacq CS+/CS- decoding accuracies during odor period (vCA1)               | 10 decoding iterations for each            | n-matched pseudopopulation of 454 cells from 11 vCA1 mice                                             | two-sided Mann-Whitney U, Bonferroni correction for $n=3$ | $U = 2.5$ , $p = 0.001$ , effect-size ( $r$ ) = 0.80           |
| Fig. 3e | Early vs Late CS+/CS- decoding accuracies during odor period (dCA1)              | 10 decoding iterations for each            | n-matched pseudopopulation of 454 cells from 4 dCA1 mice                                              | two-sided Mann-Whitney U, Bonferroni correction for $n=3$ | $U = 42$ , $p = 1$ , effect-size ( $r$ ) = 0.14                |
| Fig. 3e | Early vs Ext CS+/CS- decoding accuracies during odor period (dCA1)               | 10 decoding iterations for each            | n-matched pseudopopulation of 454 cells from 4 dCA1 mice                                              | two-sided Mann-Whitney U, Bonferroni correction for $n=3$ | $U = 70.5$ , $p = 0.39$ , effect-size ( $r$ ) = 0.35           |
| Fig. 3e | Early vs Reacq CS+/CS- decoding accuracies during odor period (dCA1)             | 10 decoding iterations for each            | n-matched pseudopopulation of 454 cells from 4 dCA1 mice                                              | two-sided Mann-Whitney U, Bonferroni correction for $n=3$ | $U = 62.5$ , $p = 1$ , effect-size ( $r$ ) = 0.21              |

| Figure  | Variable                                                                                       | Unit of Comparison                    | n                                                         | Test                                                    | Results                                     |
|---------|------------------------------------------------------------------------------------------------|---------------------------------------|-----------------------------------------------------------|---------------------------------------------------------|---------------------------------------------|
| Fig. 3e | Late vs Ext CS+/CS- decoding accuracies during odor period (dCA1)                              | 10 decoding iterations for each       | n-matched pseudopopulation of 454 cells from 4 dCA1 mice  | two-sided Mann-Whitney U, Bonferroni correction for n=3 | U = 79.5, p = 0.1, effect-size (r) = 0.13   |
| Fig. 3e | Late vs Reacq CS+/CS- decoding accuracies during odor period (dCA1)                            | 10 decoding iterations for each       | n-matched pseudopopulation of 454 cells from 4 dCA1 mice  | two-sided Mann-Whitney U, Bonferroni correction for n=3 | U = 74, p = 0.22, effect-size (r) = 0.41    |
| Fig. 3e | Ext vs Reacq CS+/CS- decoding accuracies during odor period (dCA1)                             | 10 decoding iterations for each       | n-matched pseudopopulation of 454 cells from 4 dCA1 mice  | two-sided Mann-Whitney U, Bonferroni correction for n=3 | U = 42, p = 1, effect-size (r) = 0.13       |
| Fig. 3e | Early vs Late CS+/CS- decoding accuracies during odor period (vCA1)                            | 10 decoding iterations for each       | n-matched pseudopopulation of 454 cells from 11 vCA1 mice | two-sided Mann-Whitney U, Bonferroni correction for n=3 | U = 0, p < 0.001, effect-size (r) = 0.85    |
| Fig. 3e | Early vs Ext CS+/CS- decoding accuracies during odor period (vCA1)                             | 10 decoding iterations for each       | n-matched pseudopopulation of 454 cells from 11 vCA1 mice | two-sided Mann-Whitney U, Bonferroni correction for n=3 | U = 58.5, p = 1, effect-size (r) = 0.14     |
| Fig. 3e | Early vs Reacq CS+/CS- decoding accuracies during odor period (vCA1)                           | 10 decoding iterations for each       | n-matched pseudopopulation of 454 cells from 11 vCA1 mice | two-sided Mann-Whitney U, Bonferroni correction for n=3 | U = 0, p < 0.001, effect-size (r) = 0.85    |
| Fig. 3e | Late vs Ext CS+/CS- decoding accuracies during odor period (vCA1)                              | 10 decoding iterations for each       | n-matched pseudopopulation of 454 cells from 11 vCA1 mice | two-sided Mann-Whitney U, Bonferroni correction for n=3 | U = 0, p < 0.001, effect-size (r) = 0.85    |
| Fig. 3e | Late vs Reacq CS+/CS- decoding accuracies during odor period (vCA1)                            | 10 decoding iterations for each       | n-matched pseudopopulation of 454 cells from 11 vCA1 mice | two-sided Mann-Whitney U, Bonferroni correction for n=3 | U = 46.5, p = 1., effect-size (r) = 0.14    |
| Fig. 3e | Ext vs Reacq CS+/CS- decoding accuracies during odor period (vCA1)                             | 10 decoding iterations for each       | n-matched pseudopopulation of 454 cells from 11 vCA1 mice | two-sided Mann-Whitney U, Bonferroni correction for n=3 | U = 0, p < 0.001, effect-size (r) = 0.85    |
| Fig. 3e | Early vs Late CS+/CS- decoding accuracies during odor period (dCA1)                            | 10 decoding iterations for each       | n-matched pseudopopulation of 454 cells from 4 dCA1 mice  | two-sided Mann-Whitney U, Bonferroni correction for n=3 | U = 0, p < 0.001, effect-size (r) = 0.85    |
| Fig. 3e | Early vs Ext CS+/CS- decoding accuracies during odor period (dCA1)                             | 10 decoding iterations for each       | n-matched pseudopopulation of 454 cells from 4 dCA1 mice  | two-sided Mann-Whitney U, Bonferroni correction for n=3 | U = 26, p = 0.23, effect-size (r) = 0.41    |
| Fig. 3e | Early vs Reacq CS+/CS- decoding accuracies during odor period (dCA1)                           | 10 decoding iterations for each       | n-matched pseudopopulation of 454 cells from 4 dCA1 mice  | two-sided Mann-Whitney U, Bonferroni correction for n=3 | U = 0, p < 0.001, effect-size (r) = 0.85    |
| Fig. 3e | Late vs Ext CS+/CS- decoding accuracies during odor period (dCA1)                              | 10 decoding iterations for each       | n-matched pseudopopulation of 454 cells from 4 dCA1 mice  | two-sided Mann-Whitney U, Bonferroni correction for n=3 | U = 0, p < 0.001, effect-size (r) = 0.85    |
| Fig. 3e | Late vs Reacq CS+/CS- decoding accuracies during odor period (dCA1)                            | 10 decoding iterations for each       | n-matched pseudopopulation of 454 cells from 4 dCA1 mice  | two-sided Mann-Whitney U, Bonferroni correction for n=3 | U = 80.5, p = 0.07, effect-size (r) = 0.52  |
| Fig. 3e | Ext vs Reacq CS+/CS- decoding accuracies during odor period (dCA1)                             | 10 decoding iterations for each       | n-matched pseudopopulation of 454 cells from 4 dCA1 mice  | two-sided Mann-Whitney U, Bonferroni correction for n=3 | U = 0, p < 0.001, effect-size (r) = 0.85    |
| Fig. 4c | Across-session Early/Late vs Late/Reacq CS+/CS- decoding accuracies during odor period (vCA1)  | 10 decoding iterations for each       | n-matched pseudopopulation of 241 cells from 10 vCA1 mice | two-sided Mann-Whitney U                                | U = 10, p = 0.003, effect-size (r) = 0.68   |
| Fig. 4c | Across-session Early/Late vs Late/Reacq CS+/CS- decoding accuracies during odor period (dCA1)  | 10 decoding iterations for each       | n-matched pseudopopulation of 241 cells from 4 dCA1 mice  | two-sided Mann-Whitney U                                | U = 0, p < 0.001, effect-size (r) = 0.85    |
| Fig. 4c | Across-session Early/Late vs Late/Reacq CS+/CS- decoding accuracies during trace period (vCA1) | 10 decoding iterations for each       | n-matched pseudopopulation of 241 cells from 10 vCA1 mice | two-sided Mann-Whitney U                                | U = 0, p < 0.001, effect-size (r) = 0.85    |
| Fig. 4c | Across-session Early/Late vs Late/Reacq CS+/CS- decoding accuracies during trace period (dCA1) | 10 decoding iterations for each       | n-matched pseudopopulation of 241 cells from 4 dCA1 mice  | two-sided Mann-Whitney U                                | U = 0, p < 0.001, effect-size (r) = 0.85    |
| Fig. 4d | Early/Late vs Late/Reacq, odor period, CS- trials (vCA1)                                       | Euclidean distance between MDS values | 10 MDS runs                                               | two-sided Mann-Whitney U, bonferroni correction for n=2 | U = 78, p = 0.038, effect-size (r) = 0.47   |
| Fig. 4d | Early/Late vs Late/Reacq, odor period, CS+ trials (vCA1)                                       | Euclidean distance between MDS values | 10 MDS runs                                               | two-sided Mann-Whitney U, bonferroni correction for n=2 | U = 100, p = 0.0002, effect-size (r) = 0.85 |

| Figure  | Variable                                                      | Unit of Comparison                      | n                                                        | Test                                                    | Results                                                    |
|---------|---------------------------------------------------------------|-----------------------------------------|----------------------------------------------------------|---------------------------------------------------------|------------------------------------------------------------|
| Fig. 4d | Early/Late vs Late/Reacq, odor period, CS- trials (dCA1)      | Euclidean distance between MDS values   | 10 MDS runs                                              | two-sided Mann-Whitney U, bonferroni correction for n=2 | U = 37, p = 0.35, effect-size (r) = 0.22                   |
| Fig. 4d | Early/Late vs Late/Reacq, odor period, CS+ trials (dCA1)      | Euclidean distance between MDS values   | 10 MDS runs                                              | two-sided Mann-Whitney U, bonferroni correction for n=2 | U = 46, p = 0.79, effect-size (r) = 0.07                   |
| Fig. 4e | Early/Late vs Late/Reacq, trace period, CS- trials (vCA1)     | Euclidean distance between MDS values   | 10 MDS runs                                              | two-sided Mann-Whitney U, bonferroni correction for n=2 | U = 58, p = 0.57, effect-size (r) = 0.14                   |
| Fig. 4e | Early/Late vs Late/Reacq, trace period, CS+ trials (vCA1)     | Euclidean distance between MDS values   | 10 MDS runs                                              | two-sided Mann-Whitney U, bonferroni correction for n=2 | U = 81, p = 0.021, effect-size (r) = 0.52                  |
| Fig. 4e | Early/Late vs Late/Reacq, traceperiod, CS- trials (dCA1)      | Euclidean distance between MDS values   | 10 MDS runs                                              | two-sided Mann-Whitney U, bonferroni correction for n=2 | U = 56, p = 0.68, effect-size (r) = 0.1                    |
| Fig. 4e | Early/Late vs Late/Reacq, trace period, CS+ trials (dCA1)     | Euclidean distance between MDS values   | 10 MDS runs                                              | two-sided Mann-Whitney U, bonferroni correction for n=2 | U = 97, p = < 0.001, effect-size (r) = 0.79                |
| Fig. 5b | mean lick rate (Hz)                                           | Trial type (CS1+ vs CS2+; Late session) | 13 mice ( 8 vCA1 and 5 dCA1 mice)                        | two-sided Mann-Whitney U                                | U = 96, p = 0.61, effect-size (r) = 0.12                   |
| Fig. 5b | mean lick rate (Hz)                                           | Trial type (CS3- vs CS4-; Late session) | 13 mice ( 8 vCA1 and 5 dCA1 mice)                        | two-sided Mann-Whitney U                                | U = 79.5, p = 0.81, effect-size (r) = 0.05                 |
| Fig. 5b | mean lick rate (Hz)                                           | Trial type (CS+ vs CS-; Late session)   | 13 mice ( 8 vCA1 and 5 dCA1 mice)                        | two-sided Mann-Whitney U                                | U = 676, p < 0.001, effect-size (r) = 5.96                 |
| Fig. 5c | trial type decoding accuracy, Pre session                     | 10 decoding iterations each             | n-matched pseudopopulation of 150 cells from 8 vCA1 mice | two-sided One-way ANOVA                                 |                                                            |
|         |                                                               |                                         |                                                          | region                                                  | F = 35.2, p < 0.001, effect size (ETA <sup>2</sup> ) = .31 |
|         |                                                               |                                         |                                                          | odor                                                    | F = 1.21, p = 0.31, effect size (ETA <sup>2</sup> ) = .03  |
|         |                                                               |                                         |                                                          | region*odor                                             | F = 1.4, p = 0.25, effect size (ETA <sup>2</sup> ) = .04   |
| Fig. 5d | Trial type decoding accuracy, Pre vs Late, odor period (vCA1) | 10 decoding iterations for each session | n-matched pseudopopulation of 150 cells from 8 vCA1 mice | two-sided Mann-Whitney U                                | U = 19.5, p = 0.023, effect-size (r) = 0.52                |
| Fig. 5d | Trial type decoding accuracy, Pre vs Late, odor period (dCA1) | 10 decoding iterations for each session | n-matched pseudopopulation of 150 cells from 5 dCA1 mice | two-sided Mann-Whitney U                                | U = 37.5, p = 0.36, effect-size (r) = 0.21                 |
| Fig. 5e | trial type decoding accuracy, Late session                    | 10 decoding iterations each             | n-matched pseudopopulation of 150 cells from 8 vCA1 mice | two-sided One-way ANOVA                                 |                                                            |
|         |                                                               |                                         |                                                          | region                                                  | F = 36.5, p < 0.001, effect size (ETA <sup>2</sup> ) = .34 |
|         |                                                               |                                         |                                                          | odor                                                    | F = 1.17, p = 0.33, effect size (ETA <sup>2</sup> ) = .03  |
|         |                                                               |                                         |                                                          | region*odor                                             | F = 1.15, p = 0.22, effect size (ETA <sup>2</sup> ) = .04  |
| Fig. 5f | CS+ vs CS- decoding accuracy, Pre vs Late, odor period (vCA1) | 10 decoding iterations for each session | n-matched pseudopopulation of 150 cells from 8 vCA1 mice | two-sided Mann-Whitney U                                | U = 1.0, p < 0.001, effect-size (r) = 0.83                 |
| Fig. 5f | CS+ vs CS- decoding accuracy, Pre vs Late, odor period (dCA1) | 10 decoding iterations for each session | n-matched pseudopopulation of 150 cells from 5 dCA1 mice | two-sided Mann-Whitney U                                | U = , p < 0.001, effect-size (r) = 0.85                    |
| Fig. 5h | outcome decoding, Pre vs Late, odor period (vCA1)             | 10 decoding iterations for each session | n-matched pseudopopulation of 150 cells from 8 vCA1 mice | two-sided Mann-Whitney U                                | U = 11.5, p = 0.004, effect-size (r) = 0.65                |
| Fig. 5h | outcome decoding, Pre vs Late, odor period (dCA1)             | 10 decoding iterations for each session | n-matched pseudopopulation of 150 cells from 5 dCA1 mice | two-sided Mann-Whitney U                                | U = 48, p = 0.91, effect-size (r) = 0.03                   |
| Fig. 5h | outcome decoding, Pre vs Late, trace period (vCA1)            | 10 decoding iterations for each session | n-matched pseudopopulation of 150 cells from 8 vCA1 mice | two-sided Mann-Whitney U                                | U = 0, p < 0.001, effect-size (r) = 0.85                   |
| Fig. 5h | outcome decoding, Pre vs Late, trace period (dCA1)            | 10 decoding iterations for each session | n-matched pseudopopulation of 150 cells from 5 dCA1 mice | two-sided Mann-Whitney U                                | U = 9.5, p = 0.002, effect-size (r) = 0.68                 |
| Fig. 5j | CS+/CS- vs CS1+/CS2+, odor period, Pre session (vCA1)         | Euclidean distance between MDS values   | 10 MDS runs                                              | two-sided Mann-Whitney U, bonferroni correction for n=2 | U = 91, p = 0.004, effect-size (r) = 0.69                  |
| Fig. 5j | CS+/CS- vs CS3-/CS4-, odor period, Pre session (vCA1)         | Euclidean distance between MDS values   | 10 MDS runs                                              | two-sided Mann-Whitney U, bonferroni correction for n=2 | U = 27, p = 0.18, effect-size (r) = 0.39                   |
| Fig. 5j | CS1+/CS2+ vs CS3-/CS4-, odor period, Pre session (vCA1)       | Euclidean distance between MDS values   | 10 MDS runs                                              | two-sided Mann-Whitney U, bonferroni correction for n=2 | U = 11, p = 0.007, effect-size (r) = 0.66                  |
| Fig. 5j | CS+/CS- vs CS1+/CS2+, odor period, Late session (vCA1)        | Euclidean distance between MDS values   | 10 MDS runs                                              | two-sided Mann-Whitney U, bonferroni correction for n=2 | U = 93, p = 0.002, effect-size (r) = 0.72                  |

| Figure  | Variable                                                  | Unit of Comparison                    | n           | Test                                                    | Results                                     |
|---------|-----------------------------------------------------------|---------------------------------------|-------------|---------------------------------------------------------|---------------------------------------------|
| Fig. 5j | CS+/CS- vs CS3-/CS4-, odor period, Late session (vCA1)    | Euclidean distance between MDS values | 10 MDS runs | two-sided Mann-Whitney U, bonferroni correction for n=2 | U = 100, p < 0.001, effect-size (r) = 0.85  |
| Fig. 5j | CS1+/CS2+ vs CS3-/CS4-, odor period, Late session (vCA1)  | Euclidean distance between MDS values | 10 MDS runs | two-sided Mann-Whitney U, bonferroni correction for n=2 | U = 100, p < 0.001, effect-size (r) = 0.85  |
| Fig. 5j | CS+/CS- vs CS1+/CS2+, odor period, Pre session (dCA1)     | Euclidean distance between MDS values | 10 MDS runs | two-sided Mann-Whitney U, bonferroni correction for n=2 | U = 98, p < 0.001, effect-size (r) = 0.81   |
| Fig. 5j | CS+/CS- vs CS3-/CS4-, odor period, Pre session (dCA1)     | Euclidean distance between MDS values | 10 MDS runs | two-sided Mann-Whitney U, bonferroni correction for n=2 | U = 100, p < 0.001, effect-size (r) = 0.85  |
| Fig. 5j | CS1+/CS2+ vs CS3-/CS4-, odor period, Pre session (dCA1)   | Euclidean distance between MDS values | 10 MDS runs | two-sided Mann-Whitney U, bonferroni correction for n=2 | U = 74, p = 0.15, effect-size (r) = 0.41    |
| Fig. 5j | CS+/CS- vs CS1+/CS2+, odor period, Late session (dCA1)    | Euclidean distance between MDS values | 10 MDS runs | two-sided Mann-Whitney U, bonferroni correction for n=2 | U = 50, p = 1.0, effect-size (r) = 0.0      |
| Fig. 5j | CS+/CS- vs CS3-/CS4-, odor period, Late session (dCA1)    | Euclidean distance between MDS values | 10 MDS runs | two-sided Mann-Whitney U, bonferroni correction for n=2 | U = 25, p = 0.13, effect-size (r) = 0.42    |
| Fig. 5j | CS1+/CS2+ vs CS3-/CS4-, odor period, Late session (dCA1)  | Euclidean distance between MDS values | 10 MDS runs | two-sided Mann-Whitney U, bonferroni correction for n=2 | U = 26, p = 0.15, effect-size (r) = 0.41    |
| Fig. 5j | CS+/CS- vs CS1+/CS2+, trace period, Pre session (vCA1)    | Euclidean distance between MDS values | 10 MDS runs | two-sided Mann-Whitney U, bonferroni correction for n=2 | U = 58, p = 1.0, effect-size (r) = 0.13     |
| Fig. 5j | CS+/CS- vs CS3-/CS4-, trace period, Pre session (vCA1)    | Euclidean distance between MDS values | 10 MDS runs | two-sided Mann-Whitney U, bonferroni correction for n=2 | U = 43, p = 1.0, effect-size (r) = 0.12     |
| Fig. 5j | CS1+/CS2+ vs CS3-/CS4-, trace period, Pre session (vCA1)  | Euclidean distance between MDS values | 10 MDS runs | two-sided Mann-Whitney U, bonferroni correction for n=2 | U = 41, p = 0.94, effect-size (r) = 0.15    |
| Fig. 5j | CS+/CS- vs CS1+/CS2+, trace period, Late session (vCA1)   | Euclidean distance between MDS values | 10 MDS runs | two-sided Mann-Whitney U, bonferroni correction for n=2 | U = 100, p < 0.001., effect-size (r) = 0.85 |
| Fig. 5j | CS+/CS- vs CS3-/CS4-, trace period, Late session (vCA1)   | Euclidean distance between MDS values | 10 MDS runs | two-sided Mann-Whitney U, bonferroni correction for n=2 | U = 100, p < 0.001., effect-size (r) = 0.85 |
| Fig. 5j | CS1+/CS2+ vs CS3-/CS4-, trace period, Late session (vCA1) | Euclidean distance between MDS values | 10 MDS runs | two-sided Mann-Whitney U, bonferroni correction for n=2 | U = 34, p = 0.48, effect-size (r) = 0.27    |
| Fig. 5j | CS+/CS- vs CS1+/CS2+, trace period, Pre session (dCA1)    | Euclidean distance between MDS values | 10 MDS runs | two-sided Mann-Whitney U, bonferroni correction for n=2 | U = 41, p = 1.0, effect-size (r) = 0.15     |
| Fig. 5j | CS+/CS- vs CS3-/CS4-, trace period, Pre session (dCA1)    | Euclidean distance between MDS values | 10 MDS runs | two-sided Mann-Whitney U, bonferroni correction for n=2 | U = 22, p = 0.08, effect-size (r) = 0.47    |
| Fig. 5j | CS1+/CS2+ vs CS3-/CS4-, trace period, Pre session (dCA1)  | Euclidean distance between MDS values | 10 MDS runs | two-sided Mann-Whitney U, bonferroni correction for n=2 | U = 27, p = 0.18, effect-size (r) = 0.39    |
| Fig. 5j | CS+/CS- vs CS1+/CS2+, trace period, Late session (dCA1)   | Euclidean distance between MDS values | 10 MDS runs | two-sided Mann-Whitney U, bonferroni correction for n=2 | U = 100, p < 0.001, effect-size (r) = 0.85  |
| Fig. 5j | CS+/CS- vs CS3-/CS4-, trace period, Late session (dCA1)   | Euclidean distance between MDS values | 10 MDS runs | two-sided Mann-Whitney U, bonferroni correction for n=2 | U = 100, p < 0.001, effect-size (r) = 0.85  |
| Fig. 5j | CS1+/CS2+ vs CS3-/CS4-, trace period, Late session (dCA1) | Euclidean distance between MDS values | 10 MDS runs | two-sided Mann-Whitney U, bonferroni correction for n=2 | U = 21, p = 0.06, effect-size (r) = 0.49    |

| Figure  | Variable                                                                                    | Unit of Comparison                                | n                                                         | Test                                                    | Results                                     |
|---------|---------------------------------------------------------------------------------------------|---------------------------------------------------|-----------------------------------------------------------|---------------------------------------------------------|---------------------------------------------|
| Fig. 6b | mean lick rate (Hz)                                                                         | Trial type (Rew vs Shock; Early session)          | 13 mice ( 10 vCA1 and 3 dCA1 mice)                        | two-sided Mann-Whitney U, Bonferroni correction for n=2 | U = 133, p = 0.028, effect-size (r) = 0.49  |
| Fig. 6b | mean lick rate (Hz)                                                                         | Trial type (Rew vs CS-; Early session)            | 13 mice ( 10 vCA1 and 3 dCA1 mice)                        | two-sided Mann-Whitney U, Bonferroni correction for n=2 | U = 13, p < 0.001, effect-size (r) = 0.71   |
| Fig. 6b | mean lick rate (Hz)                                                                         | Trial type (Shock vs CS-; Early session)          | 13 mice ( 10 vCA1 and 3 dCA1 mice)                        | two-sided Mann-Whitney U, Bonferroni correction for n=2 | U = 12.5, p < 0.001, effect-size (r) = 0.72 |
| Fig. 6b | mean lick rate (Hz)                                                                         | Trial type (Rew vs Shock; Late session)           | 13 mice ( 10 vCA1 and 3 dCA1 mice)                        | two-sided Mann-Whitney U, Bonferroni correction for n=2 | U = 256, p = < 0.001, effect-size (r) = 1.7 |
| Fig. 6b | mean lick rate (Hz)                                                                         | Trial type (Rew vs CS-; Late session)             | 13 mice ( 10 vCA1 and 3 dCA1 mice)                        | two-sided Mann-Whitney U, Bonferroni correction for n=2 | U = 0, p < 0.001, effect-size (r) = 0.85    |
| Fig. 6b | mean lick rate (Hz)                                                                         | Trial type (Shock vs CS-; Late session)           | 13 mice ( 10 vCA1 and 3 dCA1 mice)                        | two-sided Mann-Whitney U, Bonferroni correction for n=2 | U = 0, p = 1, effect-size (r) = 0.56        |
| Fig. 6c | CS+Rew Decoding Accuracy, Early vs Late, odor period (vCA1)                                 | 10 decoding iterations for each                   | n-matched pseudopopulation of 444 cells from 10 vCA1 mice | two-sided Fisher's Exact                                | p < 0.001, effect-size (odds ratio) = 0.23  |
| Fig. 6c | CS+Shock Decoding Accuracy, Early vs Late, odor period (vCA1)                               | 10 decoding iterations for each                   | n-matched pseudopopulation of 444 cells from 10 vCA1 mice | two-sided Fisher's Exact                                | p < 0.001, effect-size (odds ratio) = 0.24  |
| Fig. 6c | CS- Decoding Accuracy, Early vs Late, odor period (vCA1)                                    | 10 decoding iterations for each                   | n-matched pseudopopulation of 444 cells from 10 vCA1 mice | two-sided Fisher's Exact                                | p = 0.14, effect-size (odds ratio) = 0.72   |
| Fig. 6c | CS+Rew Decoding Accuracy, Early vs Late, trace period (vCA1)                                | 10 decoding iterations for each                   | n-matched pseudopopulation of 444 cells from 10 vCA1 mice | two-sided Fisher's Exact                                | p < 0.001, effect-size (odds ratio) = 0.26  |
| Fig. 6c | CS+Shock Decoding Accuracy, Early vs Late, trace period (vCA1)                              | 10 decoding iterations for each                   | n-matched pseudopopulation of 444 cells from 10 vCA1 mice | two-sided Fisher's Exact                                | p < 0.001, effect-size (odds ratio) = 0.40  |
| Fig. 6c | CS- Decoding Accuracy, Early vs Late, trace period (vCA1)                                   | 10 decoding iterations for each                   | n-matched pseudopopulation of 444 cells from 10 vCA1 mice | two-sided Fisher's Exact                                | p = 0.24, effect-size (odds ratio) = 0.76   |
| Fig. 6c | CS+Rew Decoding Accuracy, Early vs Late, odor period (dCA1)                                 | 10 decoding iterations for each                   | n-matched pseudopopulation of 444 cells from 3 dCA1 mice  | two-sided Fisher's Exact                                | p = 0.003, effect-size (odds ratio) = 0.18  |
| Fig. 6c | CS+Shock Decoding Accuracy, Early vs Late, odor period (dCA1)                               | 10 decoding iterations for each                   | n-matched pseudopopulation of 444 cells from 3 dCA1 mice  | two-sided Fisher's Exact                                | p = 0.32, effect-size (odds ratio) = 0.63   |
| Fig. 6c | CS- Decoding Accuracy, Early vs Late, odor period (dCA1)                                    | 10 decoding iterations for each                   | n-matched pseudopopulation of 444 cells from 3 dCA1 mice  | two-sided Fisher's Exact                                | p = 0.73, effect-size (odds ratio) = 0.88   |
| Fig. 6c | CS+Rew Decoding Accuracy, Early vs Late, trace period (dCA1)                                | 10 decoding iterations for each                   | n-matched pseudopopulation of 444 cells from 3 dCA1 mice  | two-sided Fisher's Exact                                | p < 0.001, effect-size (odds ratio) = 0.17  |
| Fig. 6c | CS+Shock Decoding Accuracy, Early vs Late, trace period (dCA1)                              | 10 decoding iterations for each                   | n-matched pseudopopulation of 444 cells from 3 dCA1 mice  | two-sided Fisher's Exact                                | p = 0.003, effect-size (odds ratio) = 0.48  |
| Fig. 6c | CS- Decoding Accuracy, Early vs Late, trace period (dCA1)                                   | 10 decoding iterations for each                   | n-matched pseudopopulation of 444 cells from 3 dCA1 mice  | two-sided Fisher's Exact                                | p = 0.003, effect-size (odds ratio) = 0.52  |
| Fig. 6e | mean lick rate (Hz)                                                                         | Trial type (Rew vs Shock; Early Reversal session) | 13 mice ( 10 vCA1 and 3 dCA1 mice)                        | two-sided Mann-Whitney U, Bonferroni correction for n=2 | U = 82, p = 1, effect-size (r) = 0.02       |
| Fig. 6e | mean lick rate (Hz)                                                                         | Trial type (Rew vs CS-; Early Reversal session)   | 13 mice ( 10 vCA1 and 3 dCA1 mice)                        | two-sided Mann-Whitney U, Bonferroni correction for n=2 | U = 21.5, p = 0.003, effect-size (r) = 0.62 |
| Fig. 6e | mean lick rate (Hz)                                                                         | Trial type (Shock vs CS-; Early Reversal session) | 13 mice ( 10 vCA1 and 3 dCA1 mice)                        | two-sided Mann-Whitney U, Bonferroni correction for n=2 | U = 10, p < 0.001, effect-size (r) = 0.74   |
| Fig. 6e | mean lick rate (Hz)                                                                         | Trial type (Rew vs Shock; Late Reversal session)  | 13 mice ( 10 vCA1 and 3 dCA1 mice)                        | two-sided Mann-Whitney U, Bonferroni correction for n=2 | U = 255, p = < 0.001, effect-size (r) = 1.7 |
| Fig. 6e | mean lick rate (Hz)                                                                         | Trial type (Rew vs CS-; Late Reversal session)    | 13 mice ( 10 vCA1 and 3 dCA1 mice)                        | two-sided Mann-Whitney U, Bonferroni correction for n=2 | U = 3, p < 0.001, effect-size (r) = 0.81    |
| Fig. 6e | mean lick rate (Hz)                                                                         | Trial type (Shock vs CS-; Late Reversal session)  | 13 mice ( 10 vCA1 and 3 dCA1 mice)                        | two-sided Mann-Whitney U, Bonferroni correction for n=2 | U = 110, p = 1, effect-size (r) = 0.26      |
| Fig. 6f | CS+Rew/baseline vs CS+Shock/baseline decoding accuracies, Late Reversal, odor period (vCA1) | 10 decoding iterations for each                   | n-matched pseudopopulation of 444 cells from 10 vCA1 mice | two-sided Mann-Whitney U, Bonferroni correction for n=2 | U = 100, p < 0.001, effect-size (r) = 0.85  |

| Figure  | Variable                                                                                               | Unit of Comparison              | n                                                         | Test                                                    | Results                                     |
|---------|--------------------------------------------------------------------------------------------------------|---------------------------------|-----------------------------------------------------------|---------------------------------------------------------|---------------------------------------------|
| Fig. 6f | CS+Rew/baseline vs CS-/baseline decoding accuracies, Late Reversal, odor period (vCA1)                 | 10 decoding iterations for each | n-matched pseudopopulation of 444 cells from 10 vCA1 mice | two-sided Mann-Whitney U, Bonferroni correction for n=2 | U = 100, p < 0.001, effect-size (r) = 0.85  |
| Fig. 6f | CS+Shock/baseline vs CS-/baseline decoding accuracies, Late Reversal, odor period (vCA1)               | 10 decoding iterations for each | n-matched pseudopopulation of 444 cells from 10 vCA1 mice | two-sided Mann-Whitney U, Bonferroni correction for n=2 | U = 97, p < 0.001, effect-size (r) = 0.79   |
| Fig. 6f | CS+Rew/baseline vs CS+Shock/baseline decoding accuracies, Late Reversal, odor period (dCA1)            | 10 decoding iterations for each | n-matched pseudopopulation of 444 cells from 3 dCA1 mice  | two-sided Mann-Whitney U, Bonferroni correction for n=2 | U = 17.5, p = 0.03, effect-size (r) = 0.55  |
| Fig. 6f | CS+Rew/baseline vs CS-/baseline decoding accuracies, Late Reversal, odor period (dCA1)                 | 10 decoding iterations for each | n-matched pseudopopulation of 444 cells from 3 dCA1 mice  | two-sided Mann-Whitney U, Bonferroni correction for n=2 | U = 27.5, p = 0.19, effect-size (r) = 0.38  |
| Fig. 6f | CS+Shock/baseline vs CS-/baseline decoding accuracies, Late Reversal, odor period (dCA1)               | 10 decoding iterations for each | n-matched pseudopopulation of 444 cells from 3 dCA1 mice  | two-sided Mann-Whitney U, Bonferroni correction for n=2 | U = 55.5, p = 1, effect-size (r) = 0.09     |
| Fig. 6f | CS+Rew/baseline vs CS+Shock/baseline decoding accuracies, Late Reversal, trace period (vCA1)           | 10 decoding iterations for each | n-matched pseudopopulation of 444 cells from 10 vCA1 mice | two-sided Mann-Whitney U, Bonferroni correction for n=2 | U = 100, p < 0.001, effect-size (r) = 0.85  |
| Fig. 6f | CS+Rew/baseline vs CS-/baseline decoding accuracies, Late Reversal, trace period (vCA1)                | 10 decoding iterations for each | n-matched pseudopopulation of 444 cells from 10 vCA1 mice | two-sided Mann-Whitney U, Bonferroni correction for n=2 | U = 100, p < 0.001, effect-size (r) = 0.85  |
| Fig. 6f | CS+Shock/baseline vs CS-/baseline decoding accuracies, Late Reversal, trace period (vCA1)              | 10 decoding iterations for each | n-matched pseudopopulation of 444 cells from 10 vCA1 mice | two-sided Mann-Whitney U, Bonferroni correction for n=2 | U = 22.5, p = 0.08, effect-size (r) = 0.46  |
| Fig. 6f | CS+Rew/baseline vs CS+Shock/baseline decoding accuracies, Late Reversal, trace period (dCA1)           | 10 decoding iterations for each | n-matched pseudopopulation of 444 cells from 3 dCA1 mice  | two-sided Mann-Whitney U, Bonferroni correction for n=2 | U = 100, p < 0.001, effect-size (r) = 0.85  |
| Fig. 6f | CS+Rew/baseline vs CS-/baseline decoding accuracies, Late Reversal, trace period (dCA1)                | 10 decoding iterations for each | n-matched pseudopopulation of 444 cells from 3 dCA1 mice  | two-sided Mann-Whitney U, Bonferroni correction for n=2 | U = 100, p < 0.001, effect-size (r) = 0.85  |
| Fig. 6f | CS+Shock/baseline vs CS-/baseline decoding accuracies, Late Reversal, trace period (dCA1)              | 10 decoding iterations for each | n-matched pseudopopulation of 444 cells from 3 dCA1 mice  | two-sided Mann-Whitney U, Bonferroni correction for n=2 | U = 23.5, p = 0.095, effect-size (r) = 0.45 |
| Fig. 6g | Odor A/baseline vs odor B/baseline decoding accuracies across reversal training, odor period (vCA1)    | 10 decoding iterations for each | n-matched pseudopopulation of 281 cells from 10 vCA1 mice | two-sided Mann-Whitney U, Bonferroni correction for n=2 | U = 42.5, p = 1, effect-size (r) = 0.13     |
| Fig. 6g | Odor A/baseline vs odor C/baseline decoding accuracies across reversal training, odor period (vCA1)    | 10 decoding iterations for each | n-matched pseudopopulation of 281 cells from 10 vCA1 mice | two-sided Mann-Whitney U, Bonferroni correction for n=2 | U = 0, p < 0.001, effect-size (r) = 0.85    |
| Fig. 6g | Odor B/baseline vs odor C/baseline decoding accuracies across reversal training, odor period (vCA1)    | 10 decoding iterations for each | n-matched pseudopopulation of 281 cells from 10 vCA1 mice | two-sided Mann-Whitney U, Bonferroni correction for n=2 | U = 0, p < 0.001, effect-size (r) = 0.85    |
| Fig. 6g | Odor A/baseline vs odor B/baseline decoding accuracies across reversal training, odor period (dCA1)    | 10 decoding iterations for each | n-matched pseudopopulation of 281 cells from 3 dCA1 mice  | two-sided Mann-Whitney U, Bonferroni correction for n=2 | U = 36, p = 0.61, effect-size (r) = 0.24    |
| Fig. 6g | Odor A/baseline vs odor C/baseline decoding accuracies across reversal training, odor period (dCA1)    | 10 decoding iterations for each | n-matched pseudopopulation of 281 cells from 3 dCA1 mice  | two-sided Mann-Whitney U, Bonferroni correction for n=2 | U = 39.5, p = .9, effect-size (r) = 0.18    |
| Fig. 6g | Odor B/baseline vs odor C/baseline decoding accuracies across reversal training, odor period (dCA1)    | 10 decoding iterations for each | n-matched pseudopopulation of 281 cells from 3 dCA1 mice  | two-sided Mann-Whitney U, Bonferroni correction for n=2 | U = 28, p = .21, effect-size (r) = 0.37     |
| Fig. 6h | CS+Rew/baseline vs CS+Shock/baseline decoding accuracies across reversal training, trace period (vCA1) | 10 decoding iterations for each | n-matched pseudopopulation of 281 cells from 10 vCA1 mice | two-sided Mann-Whitney U, Bonferroni correction for n=2 | U = 100, p < 0.001, effect-size (r) = 0.85  |
| Fig. 6h | CS+Rew/baseline vs CS-/baseline decoding accuracies across reversal training, trace period (vCA1)      | 10 decoding iterations for each | n-matched pseudopopulation of 281 cells from 10 vCA1 mice | two-sided Mann-Whitney U, Bonferroni correction for n=2 | U = 0, p < 0.001, effect-size (r) = 0.85    |
| Fig. 6h | CS+Shock/baseline vs CS-/baseline decoding accuracies across reversal training, trace period (vCA1)    | 10 decoding iterations for each | n-matched pseudopopulation of 281 cells from 10 vCA1 mice | two-sided Mann-Whitney U, Bonferroni correction for n=2 | U = 55, p = 1, effect-size (r) = 0.08       |

| Figure     | Variable                                                                                               | Unit of Comparison                     | n                                                                    | Test                                                    | Results                                                      |
|------------|--------------------------------------------------------------------------------------------------------|----------------------------------------|----------------------------------------------------------------------|---------------------------------------------------------|--------------------------------------------------------------|
| Fig. 6h    | CS+Rew/baseline vs CS+Shock/baseline decoding accuracies across reversal training, trace period (dCA1) | 10 decoding iterations for each        | n-matched pseudopopulation of 281 cells from 3 dCA1 mice             | two-sided Mann-Whitney U, Bonferroni correction for n=2 | U = 100, p < 0.001, effect-size (r) = 0.85                   |
| Fig. 6h    | CS+Rew/baseline vs CS-/baseline decoding accuracies across reversal training, trace period (dCA1)      | 10 decoding iterations for each        | n-matched pseudopopulation of 281 cells from 3 dCA1 mice             | two-sided Mann-Whitney U, Bonferroni correction for n=2 | U = 0, p < 0.001, effect-size (r) = 0.85                     |
| Fig. 6h    | CS+Shock/baseline vs CS-/baseline decoding accuracies across reversal training, trace period (dCA1)    | 10 decoding iterations for each        | n-matched pseudopopulation of 281 cells from 3 dCA1 mice             | two-sided Mann-Whitney U, Bonferroni correction for n=2 | U = 49, p = 1, effect-size (r) = 0.17                        |
| Fig. 7c    | propotion of reward trials with suprathreshold running                                                 | Early vs. Late sessions                | 12 mice (8 vCA1, 4 dCA1)                                             | two-sided Mann-Whitney U                                | U = 36, p = 0.004, effect-size (r) = 0.2                     |
| Fig. 7c    | propotion of CS- trials with suprathreshold running                                                    | Early vs. Late sessions                | 12 mice (8 vCA1, 4 dCA1)                                             | two-sided Mann-Whitney U                                | U = 43.5, p = 0.01, effect-size (r) = 0.18                   |
| Fig. 7c    | propotion of shock trials with suprathreshold running                                                  | Early vs. Late sessions                | 12 mice (8 vCA1, 4 dCA1)                                             | two-sided Mann-Whitney U                                | U = 0, p < 0.001, effect-size (r) = 0.32                     |
| Fig. 7d    | mean lick rate (Hz)                                                                                    | Trial type (Rew vs Shock)              | 12 mice (8 vCA1, 4 dCA1)                                             | two-sided Mann-Whitney U                                | U = 139.5, p < 0.001, effect-size (r) = 0.8                  |
| Fig. 7d    | mean lick rate (Hz)                                                                                    | Trial type (Rew vs CS-)                | 12 mice (8 vCA1, 4 dCA1)                                             | two-sided Mann-Whitney U                                | U = 138, p < 0.001, effect-size (r) = 0.78                   |
| Fig. 7d    | mean lick rate (Hz)                                                                                    | Trial type (CS- vs Shock)              | 12 mice (8 vCA1, 4 dCA1)                                             | two-sided Mann-Whitney U                                | U = 71.5, p = 1.0, effect-size (r) = 0.006                   |
| Fig. 7e    | CS+Rew/baseline vs CS+Shock/baseline decoding accuracies, Late, odor period (vCA1)                     | 10 decoding iterations for each        | n-matched pseudopopulation of 340 cells from 8 vCA1 mice             | two-sided Mann-Whitney U, Bonferroni correction for n=2 | U = 44.5, p = 1.0, effect-size (r) = 0.09                    |
| Fig. 7e    | CS+Rew/baseline vs CS-/baseline decoding accuracies, Late, odor period (vCA1)                          | 10 decoding iterations for each        | n-matched pseudopopulation of 340 cells from 8 vCA1 mice             | two-sided Mann-Whitney U, Bonferroni correction for n=2 | U = 98, p < 0.001, effect-size (r) = 0.81                    |
| Fig. 7e    | CS+Shock/baseline vs CS-/baseline decoding accuracies, Late, odor period (vCA1)                        | 10 decoding iterations for each        | n-matched pseudopopulation of 340 cells from 8 vCA1 mice             | two-sided Mann-Whitney U, Bonferroni correction for n=2 | U = 100, p < 0.001, effect-size (r) = 0.85                   |
| Fig. 7e    | CS+Rew/baseline vs CS+Shock/baseline decoding accuracies, Late, odor period (dCA1)                     | 10 decoding iterations for each        | n-matched pseudopopulation of 340 cells from 4 dCA1 mice             | two-sided Mann-Whitney U, Bonferroni correction for n=2 | U = 20.5, p = 0.049, effect-size (r) = 0.5                   |
| Fig. 7e    | CS+Rew/baseline vs CS-/baseline decoding accuracies, Late, odor period (dCA1)                          | 10 decoding iterations for each        | n-matched pseudopopulation of 340 cells from 4 dCA1 mice             | two-sided Mann-Whitney U, Bonferroni correction for n=2 | U = 36.5, p = 0.64, effect-size (r) = 0.23                   |
| Fig. 7e    | CS+Shock/baseline vs CS-/baseline decoding accuracies, Late, odor period (dCA1)                        | 10 decoding iterations for each        | n-matched pseudopopulation of 340 cells from 4 dCA1 mice             | two-sided Mann-Whitney U, Bonferroni correction for n=2 | U = 65.5, p = 0.47, effect-size (r) = 0.26                   |
| Fig. 7e    | CS+Rew/baseline vs CS+Shock/baseline decoding accuracies, Late, trace period (vCA1)                    | 10 decoding iterations for each        | n-matched pseudopopulation of 340 cells from 8 vCA1 mice             | two-sided Mann-Whitney U, Bonferroni correction for n=2 | U = 100, p < 0.001, effect-size (r) = 0.85                   |
| Fig. 7e    | CS+Rew/baseline vs CS-/baseline decoding accuracies, Late, trace period (vCA1)                         | 10 decoding iterations for each        | n-matched pseudopopulation of 340 cells from 8 vCA1 mice             | two-sided Mann-Whitney U, Bonferroni correction for n=2 | U = 100, p < 0.001, effect-size (r) = 0.85                   |
| Fig. 7e    | CS+Shock/baseline vs CS-/baseline decoding accuracies, Late, trace period (vCA1)                       | 10 decoding iterations for each        | n-matched pseudopopulation of 340 cells from 8 vCA1 mice             | two-sided Mann-Whitney U, Bonferroni correction for n=2 | U = 60, p = 0.94, effect-size (r) = 0.17                     |
| Fig. 7e    | CS+Rew/baseline vs CS+Shock/baseline decoding accuracies, Late, trace period (dCA1)                    | 10 decoding iterations for each        | n-matched pseudopopulation of 340 cells from 4 dCA1 mice             | two-sided Mann-Whitney U, Bonferroni correction for n=2 | U = 40, p = 0.92, effect-size (r) = 0.17                     |
| Fig. 7e    | CS+Rew/baseline vs CS-/baseline decoding accuracies, Late, trace period (dCA1)                         | 10 decoding iterations for each        | n-matched pseudopopulation of 340 cells from 4 dCA1 mice             | two-sided Mann-Whitney U, Bonferroni correction for n=2 | U = 76, p = 0.1, effect-size (r) = 0.44                      |
| Fig. 7e    | CS+Shock/baseline vs CS-/baseline decoding accuracies, Late, trace period (dCA1)                       | 10 decoding iterations for each        | n-matched pseudopopulation of 340 cells from 4 dCA1 mice             | two-sided Mann-Whitney U, Bonferroni correction for n=2 | U = 81.5, p = 0.035, effect-size (r) = 0.53                  |
| ED Fig. 2c | odor1/odor2 decoding accuracy, vCA1 vs dCA1 (0.5 sed time bins)                                        | 10 decoding iterations for each region | n-matched pseudopopulation of 454 cells from 11 vCA1 and 5 dCA1 mice | two-sided Mann-Whitney U                                | colored-coded bar above graph shows time bins where p < 0.01 |
| ED Fig. 2d | odor1/odor2 decoding accuracy, vCA1 vs dCA1 (2 sec time bins)                                          | 10 decoding iterations for each region | n-matched pseudopopulation of 454 cells from 11 vCA1 and 5 dCA1 mice | two-sided Mann-Whitney U                                | colored-coded bar above graph shows time bins where p < 0.01 |



| Figure     | Variable                                                                               | Unit of Comparison                                | n                                                                    | Test                            | Results                                                    |
|------------|----------------------------------------------------------------------------------------|---------------------------------------------------|----------------------------------------------------------------------|---------------------------------|------------------------------------------------------------|
| ED Fig. 2e | decoding accuracy vs baseline                                                          | 10 decoding iterations each                       | n-matched pseudopopulation of 454 cells from 11 vCA1 and 5 dCA1 mice | two-sided one-way ANOVA         |                                                            |
|            |                                                                                        |                                                   |                                                                      | region                          | F = 107, p < 0.001, effect size (ETA^2) = .70              |
|            |                                                                                        |                                                   |                                                                      | odor                            | F = .47, p = 0.5, effect size (ETA^2) = .003               |
|            |                                                                                        |                                                   |                                                                      | region*odor                     | F = 9.92, p = 0.003, effect size (ETA^2) = .065            |
| ED Fig. 2e | vCA1 vs dCA1 odor1/baseline decoding accuracies                                        | 10 decoding iterations for each region            | n-matched pseudopopulation of 454 cells from 11 vCA1 and 5 dCA1 mice | two-sided Mann-Whitney U        | U = 0, p = 0.00017, effect-size (r) = 0.85                 |
| ED Fig. 2e | vCA1 vs dCA1 odor2/baseline decoding accuracies                                        | 10 decoding iterations for each region            | n-matched pseudopopulation of 454 cells from 11 vCA1 and 5 dCA1 mice | two-sided Mann-Whitney U        | U = 12.0, p = 0.0046, effect-size (r) = 0.64               |
| ED Fig. 3c | Early vs Late linear regression of calcium activity and lick rate                      | Early vs Late sessions                            | 10 vCA1 mice                                                         | two-sided T-test                | t = 1.86, p = 0.079, effect-size (Cohen's d) = 0.88        |
| ED Fig. 3c | Early vs Late linear regression of calcium activity and lick rate                      | Early vs Late sessions                            | 5 dCA1 mice                                                          | two-sided T-test                | t = 1.51 p = 0.17, effect-size (Cohen's d) = 1.07          |
| ED Fig. 3d | CS+ responsive cells during odor period, Early vs Late (vCA1)                          | total combined cells from 11 vCA1 mice            | see figure for exact cell numbers                                    | two-sided Fisher's Exact        | p = 0.003, effect-size (odds ratio) = 2.02                 |
| ED Fig. 3d | CS- responsive cells during odor period, Early vs Late (vCA1)                          | total combined cells from 11 vCA1 mice            | see figure for exact cell numbers                                    | two-sided Fisher's Exact        | p = 0.13, effect-size (odds ratio) = 0.6                   |
| ED Fig. 3d | CS+ responsive cells during trace period, Early vs Late (vCA1)                         | total combined cells from 11 vCA1 mice            | see figure for exact cell numbers                                    | two-sided Fisher's Exact        | p < 0.001, effect-size (odds ratio) = 4.56                 |
| ED Fig. 3d | CS- responsive cells during trace period, Early vs Late (vCA1)                         | total combined cells from 11 vCA1 mice            | see figure for exact cell numbers                                    | two-sided Fisher's Exact        | p = 0.055, effect-size (odds ratio) = 6.96                 |
| ED Fig. 3d | CS+ responsive cells during odor period, Early vs Late (dCA1)                          | total combined cells from 4 dCA1 mice             | see figure for exact cell numbers                                    | two-sided Fisher's Exact        | p < 0.001, effect-size (odds ratio) = 2.7                  |
| ED Fig. 3d | CS- responsive cells during odor period, Early vs Late (dCA1)                          | total combined cells from 4 dCA1 mice             | see figure for exact cell numbers                                    | two-sided Fisher's Exact        | p = 0.38, effect-size (odds ratio) = 0.79                  |
| ED Fig. 3d | CS+ responsive cells during trace period, Early vs Late (dCA1)                         | total combined cells from 4 dCA1 mice             | see figure for exact cell numbers                                    | two-sided Fisher's Exact        | p < 0.001, effect-size (odds ratio) = 8.24                 |
| ED Fig. 3d | CS- responsive cells during trace period, Early vs Late (dCA1)                         | total combined cells from 4 dCA1 mice             | see figure for exact cell numbers                                    | two-sided Fisher's Exact        | p = 0.004, effect-size (odds ratio) = 11.3                 |
| ED Fig. 4c | CS+/baseline (upper) or CS-/baseline (lower) decoding accuracies, Pre vs Late sessions | 10 decoding iterations for each                   | n-matched pseudopopulation of 454 cells from 11 vCA1 or 5 dCA1 mice  | two-sided Mann-Whitney U        | color-coded bars above graph show time bins where p < 0.01 |
| ED Fig. 4d | Early vs Late, odor period (vCA1)                                                      | Euclidean distance between CS+ and CS- MDS values | 10 MDS runs                                                          | two-sided Mann-Whitney U        | U = 2, p < 0.001, effect-size (r) = 0.81                   |
| ED Fig. 4d | Early vs Late, trace period (vCA1)                                                     | Euclidean distance between CS+ and CS- MDS values | 10 MDS runs                                                          | two-sided Mann-Whitney U        | U = 3, p < 0.001, effect-size (r) = 0.79                   |
| ED Fig. 4d | Early vs Late, odor period (dCA1)                                                      | Euclidean distance between CS+ and CS- MDS values | 10 MDS runs                                                          | two-sided Mann-Whitney U        | U = 25, p = 0.064, effect-size (r) = 0.42                  |
| ED Fig. 4d | Early vs Late, trace period (dCA1)                                                     | Euclidean distance between CS+ and CS- MDS values | 10 MDS runs                                                          | two-sided Mann-Whitney U        | U = 0, p < 0.001, effect-size (r) = 0.85                   |
| ED Fig. 4f | CS+/CS- decoding accuracy, odor period                                                 | pre vs post 'aha' point                           | 11 vCA1 mice                                                         | two-sided Mann-Whitney U        | U = 21, p = .031, effect-size (r) = 0.49                   |
| ED Fig. 4f | CS+/CS- decoding accuracy, trace period                                                | pre vs post 'aha' point                           | 11 vCA1 mice                                                         | two-sided Mann-Whitney U        | U = 0, p < .001, effect-size (r) = 0.84                    |
| ED Fig. 4f | CS+/CS- decoding accuracy, odor period                                                 | pre vs post 'aha' point                           | 4 dCA1 mice                                                          | two-sided Mann-Whitney U        | U = 27, p = 0.089., effect-size (r) = 0.39                 |
| ED Fig. 4f | CS+/CS- decoding accuracy, trace period                                                | pre vs post 'aha' point                           | 4 dCA1 mice                                                          | two-sided Mann-Whitney U        | U = 19, p = .021., effect-size (r) = 0.52.                 |
| ED Fig. 6i | linear regression of decoder weights (with activity regressed out) across sessions     | Early vs Late, odor period                        | 11 vCA1 mice                                                         | linear least-squares regression | slope = 0.1, r^2 = 0.008, p = 0.19                         |
| ED Fig. 6i | linear regression of decoder weights (with activity regressed out) across sessions     | Early vs Late, trace period                       | 11 vCA1 mice                                                         | linear least-squares regression | slope = 0.19, r^2 = 0.02, p = 0.032                        |
| ED Fig. 6i | linear regression of decoder weights (with activity regressed out) across sessions     | Late vs Reacquisition, odor period                | 10 vCA1 mice                                                         | linear least-squares regression | slope = 0.29, r^2 = 0.09, p < 0.001                        |
| ED Fig. 6i | linear regression of decoder weights (with activity regressed out) across sessions     | Late vs Reacquisition, trace period               | 10 vCA1 mice                                                         | linear least-squares regression | slope = 0.29, r^2 = 0.08, p < 0.001                        |
| ED Fig. 6i | linear regression of decoder weights (with activity regressed out) across sessions     | Early vs Late, odor period                        | 4 dCA1 mice                                                          | linear least-squares regression | slope = 0.11, r^2 = 0.014, p = 0.038                       |
| ED Fig. 6i | linear regression of decoder weights (with activity regressed out) across sessions     | Early vs Late, trace period                       | 4 dCA1 mice                                                          | linear least-squares regression | slope = 0.1, r^2 = 0.004, p = 0.26                         |
| ED Fig. 6i | linear regression of decoder weights (with activity regressed out) across sessions     | Late vs Reacquisition, odor period                | 5 dCA1 mice                                                          | linear least-squares regression | slope = 0.21, r^2 = 0.038, p < 0.001                       |

| Figure       | Variable                                                                                          | Unit of Comparison                      | n                                                                    | Test                            | Results                                                                                                                                                                                                              |
|--------------|---------------------------------------------------------------------------------------------------|-----------------------------------------|----------------------------------------------------------------------|---------------------------------|----------------------------------------------------------------------------------------------------------------------------------------------------------------------------------------------------------------------|
| ED Fig. 6i   | linear regression of decoder weights (with activity regressed out) across sessions                | Late vs Reacquisition, trace period     | 5 dCA1 mice                                                          | linear least-squares regression | slope = 0.25, $r^2 = 0.05$ , $p < 0.001$                                                                                                                                                                             |
| ED Fig. 7c   | Late session linear regression of calcium activity and breathing rate                             | imaging sessions                        | 8 vCA1, 4 dCA1 mice                                                  | two-sided T-test                | $t = 0.69$ , $p = 0.51$ , effect-size (Cohen's $d$ ) = 0.54                                                                                                                                                          |
| ED Fig. 8b   | mean lick rate (Hz)                                                                               | Trial type (CS1+ vs CS2+; Post session) | 13 mice ( 8 vCA1 and 5 dCA1 mice)                                    | two-sided Mann-Whitney U        | $U = 88.5$ , $p = 0.86$ , effect-size ( $r$ ) = 0.05                                                                                                                                                                 |
| ED Fig. 8b   | mean lick rate (Hz)                                                                               | Trial type (CS3- vs CS4-; Post session) | 13 mice ( 8 vCA1 and 5 dCA1 mice)                                    | two-sided Mann-Whitney U        | $U = 42.5$ , $p = 0.07$ , effect-size ( $r$ ) = 0.42                                                                                                                                                                 |
| ED Fig. 8b   | mean lick rate (Hz)                                                                               | Trial type (CS+ vs CS-; Post session)   | 13 mice ( 8 vCA1 and 5 dCA1 mice)                                    | two-sided Mann-Whitney U        | $U = 676$ , $p < 0.001$ , effect-size ( $r$ ) = 5.96                                                                                                                                                                 |
| ED Fig. 8e   | outcome decoding, odor period vs trace period (vCA1)                                              | 10 decoding iterations for each         | 150 cells from 8 vCA1 mice                                           | two-sided Mann-Whitney U        | $U = 38$ , $p = 0.38$ , effect-size ( $r$ ) = 0.2                                                                                                                                                                    |
| ED Fig. 8e   | outcome decoding, odor period vs trace period (dCA1)                                              | 10 decoding iterations for each         | 150 cells from 5 dCA1 mice                                           | two-sided Mann-Whitney U        | $U = 0$ , $p < 0.001$ , effect-size ( $r$ ) = 0.85                                                                                                                                                                   |
| ED Fig. 8g   | Across-session Early/Late vs Late/Reacq trial type decoding accuracies during odor period (vCA1)  | 10 decoding iterations for each         | n-matched pseudopopulation of 100 cells from 8 vCA1 mice             | two-sided Mann-Whitney U        | $U = 0$ , $p < 0.001$ , effect-size ( $r$ ) = 0.85                                                                                                                                                                   |
| ED Fig. 8g   | Across-session Early/Late vs Late/Reacq trial type decoding accuracies during odor period (dCA1)  | 10 decoding iterations for each         | n-matched pseudopopulation of 100 cells from 5 dCA1 mice             | two-sided Mann-Whitney U        | $U = 4$ , $p < 0.001$ , effect-size ( $r$ ) = 0.78                                                                                                                                                                   |
| ED Fig. 8g   | Across-session Early/Late vs Late/Reacq trial type decoding accuracies during trace period (vCA1) | 10 decoding iterations for each         | n-matched pseudopopulation of 100 cells from 8 vCA1 mice             | two-sided Mann-Whitney U        | $U = 7$ , $p = 0.0012$ , effect-size ( $r$ ) = 0.73                                                                                                                                                                  |
| ED Fig. 8g   | Across-session Early/Late vs Late/Reacq trial type decoding accuracies during trace period (dCA1) | 10 decoding iterations for each         | n-matched pseudopopulation of 100 cells from 5 dCA1 mice             | two-sided Mann-Whitney U        | $U = 10$ , $p = 0.003$ , effect-size ( $r$ ) = 0.68                                                                                                                                                                  |
| ED Fig. 8h   | Across-session Early/Late vs Late/Reacq CS+/CS- decoding accuracies during odor period (vCA1)     | 10 decoding iterations for each         | n-matched pseudopopulation of 100 cells from 8 vCA1 mice             | two-sided Mann-Whitney U        | $U = 0$ , $p < 0.001$ , effect-size ( $r$ ) = 0.85                                                                                                                                                                   |
| ED Fig. 8h   | Across-session Early/Late vs Late/Reacq CS+/CS- decoding accuracies during odor period (dCA1)     | 10 decoding iterations for each         | n-matched pseudopopulation of 100 cells from 5 dCA1 mice             | two-sided Mann-Whitney U        | $U = 3$ , $p < 0.001$ , effect-size ( $r$ ) = 0.79                                                                                                                                                                   |
| ED Fig. 8h   | Across-session Early/Late vs Late/Reacq CS+/CS- decoding accuracies during trace period (vCA1)    | 10 decoding iterations for each         | n-matched pseudopopulation of 100 cells from 8 vCA1 mice             | two-sided Mann-Whitney U        | $U = 6$ , $p = 0.001$ , effect-size ( $r$ ) = 0.74                                                                                                                                                                   |
| ED Fig. 8h   | Across-session Early/Late vs Late/Reacq CS+/CS- decoding accuracies during trace period (dCA1)    | 10 decoding iterations for each         | n-matched pseudopopulation of 100 cells from 5 dCA1 mice             | two-sided Mann-Whitney U        | $U = 0$ , $p < 0.001$ , effect-size ( $r$ ) = 0.85                                                                                                                                                                   |
| ED Fig.9b    | CS+Shock/CS- decoding accuracy, odor period, Early vs Late (vCA1)                                 | 10 decoding iterations for each session | n-matched pseudopopulation of 444 cells from 10 vCA1 mice            | two-sided Mann-Whitney U        | $U = 0$ , $p < 0.001$ , effect-size ( $r$ ) = 0.85                                                                                                                                                                   |
| ED Fig.9b    | CS+Shock/CS- decoding accuracy, odor period, Early vs Late (dCA1)                                 | 10 decoding iterations for each session | n-matched pseudopopulation of 444 cells from 3 dCA1 mice             | two-sided Mann-Whitney U        | $U = 49.5$ , $p = 1$ , effect-size ( $r$ ) = 0.008                                                                                                                                                                   |
| ED Fig.9b    | CS+Shock/CS- decoding accuracy, trace period, Early vs Late (vCA1)                                | 10 decoding iterations for each session | n-matched pseudopopulation of 444 cells from 10 vCA1 mice            | two-sided Mann-Whitney U        | $U = 9$ , $p = 0.002$ , effect-size ( $r$ ) = 0.69                                                                                                                                                                   |
| ED Fig.9b    | CS+Shock/CS- decoding accuracy, trace period, Early vs Late (dCA1)                                | 10 decoding iterations for each session | n-matched pseudopopulation of 444 cells from 3 dCA1 mice             | two-sided Mann-Whitney U        | $U = 12$ , $p = 0.005$ , effect-size ( $r$ ) = 0.64                                                                                                                                                                  |
| ED Fig.9c    | CS+Rew/CS- decoding accuracy, odor period, Early vs Late (vCA1)                                   | 10 decoding iterations for each session | n-matched pseudopopulation of 444 cells from 10 vCA1 mice            | two-sided Mann-Whitney U        | $U = 0$ , $p < 0.001$ , effect-size ( $r$ ) = 0.85                                                                                                                                                                   |
| ED Fig.9c    | CS+Rew/CS- decoding accuracy, odor period, Early vs Late (dCA1)                                   | 10 decoding iterations for each session | n-matched pseudopopulation of 444 cells from 3 dCA1 mice             | two-sided Mann-Whitney U        | $U = 0$ , $p < 0.001$ , effect-size ( $r$ ) = 0.77                                                                                                                                                                   |
| ED Fig.9c    | CS+Rew/CS- decoding accuracy, trace period, Early vs Late (vCA1)                                  | 10 decoding iterations for each session | n-matched pseudopopulation of 444 cells from 10 vCA1 mice            | two-sided Mann-Whitney U        | $U = 11$ , $p = 0.004$ , effect-size ( $r$ ) = 0.66                                                                                                                                                                  |
| ED Fig.9c    | CS+Rew/CS- decoding accuracy, trace period, Early vs Late (dCA1)                                  | 10 decoding iterations for each session | n-matched pseudopopulation of 444 cells from 3 dCA1 mice             | two-sided Mann-Whitney U        | $U = 0$ , $p < 0.001$ , effect-size ( $r$ ) = 0.85                                                                                                                                                                   |
| ED Fig. 9d,e | trial type decoding accuracy, odor period, Late session                                           | 10 decoding iterations each             | n-matched pseudopopulation of 444 cells from 10 vCA1 and 3 dCA1 mice | two-sided one-way ANOVA         | region<br>$F = 47.7$ , $p < 0.001$ , effect size ( $\eta^2$ ) = .24<br>odor<br>$F = 33.8$ , $p < 0.001$ , effect size ( $\eta^2$ ) = .34<br>region*odor<br>$F = 14.6$ , $p < 0.001$ , effect size ( $\eta^2$ ) = .15 |
| ED Fig. 9d,e | trial type decoding accuracy, trace period, Late session                                          | 10 decoding iterations each             | n-matched pseudopopulation of 444 cells from 10 vCA1 and 3 dCA1 mice | two-sided one-way ANOVA         | region<br>$F = 2.5$ , $p = 0.12$ , effect size ( $\eta^2$ ) = .02<br>odor<br>$F = 28.4$ , $p < 0.001$ , effect size ( $\eta^2$ ) = .52<br>region*odor<br>$F = .94$ , $p = 0.4$ , effect size ( $\eta^2$ ) = .03      |
| ED Fig.9i    | Odor identity decoding accuracy across reversal learning (Late/Late Reversal), vCA1 vs dCA1       | 10 decoding iterations for each region  | n-matched pseudopopulation of 281 cells from 10 vCA1 and 3 dCA1 mice | two-sided Mann-Whitney U        | $U = 41$ , $p = 0.52$ , effect-size ( $r$ ) = 0.15                                                                                                                                                                   |

| Figure      | Variable                                                                                                                  | Unit of Comparison                                                                         | n                                                                   | Test                                                    | Results                                                     |
|-------------|---------------------------------------------------------------------------------------------------------------------------|--------------------------------------------------------------------------------------------|---------------------------------------------------------------------|---------------------------------------------------------|-------------------------------------------------------------|
| ED Fig.9j   | Trial type decoding accuracy across reversal learning, trace period, Rew/CS- accuracy vs Sh/CS- accuracy (vCA1)           | 10 decoding iterations each                                                                | n-matched pseudopopulation of 281 cells from 10 vCA1 mice           | two-sided Mann-Whitney U                                | U = 100, p < 0.001, effect-size (r) = 0.85                  |
| ED Fig.9j   | Trial type decoding accuracy across reversal learning, trace period, Rew/CS- accuracy vs Sh/CS- accuracy (dCA1)           | 10 decoding iterations each                                                                | n-matched pseudopopulation of 281 cells from 3 dCA1 mice            | two-sided Mann-Whitney U                                | U = 100, p < 0.001, effect-size (r) = 0.85                  |
| ED Fig. 10c | trial type decoding accuracy, odor period                                                                                 | 10 decoding iterations each                                                                | n-matched pseudopopulation of 340 cells from 8 vCA1 and 4 dCA1 mice | two-sided one-way ANOVA                                 |                                                             |
|             |                                                                                                                           |                                                                                            |                                                                     | region                                                  | F = 1.6, p = 0.21, effect size (ETA <sup>2</sup> ) = .03    |
|             |                                                                                                                           |                                                                                            |                                                                     | odor                                                    | F = 0.95, p = 0.39, effect size (ETA <sup>2</sup> ) = .03   |
|             |                                                                                                                           |                                                                                            |                                                                     | region*odor                                             | F = 1.44, p = 0.25, effect size (ETA <sup>2</sup> ) = .05   |
| ED Fig. 10c | trial type decoding accuracy, trace period                                                                                | 10 decoding iterations each                                                                | n-matched pseudopopulation of 340 cells from 8 vCA1 and 4 dCA1 mice | two-sided one-way ANOVA                                 |                                                             |
|             |                                                                                                                           |                                                                                            |                                                                     | region                                                  | F = 5.16, p = 0.027, effect size (ETA <sup>2</sup> ) = .048 |
|             |                                                                                                                           |                                                                                            |                                                                     | odor                                                    | F = 15.3, p < 0.001, effect size (ETA <sup>2</sup> ) = .29  |
|             |                                                                                                                           |                                                                                            |                                                                     | region*odor                                             | F = 9.4, p < 0.001, effect size (ETA <sup>2</sup> ) = .17   |
| ED Fig. 10d | comparison of Rew vs CS- and Sh vs CS- decoding accuracies during odor period (vCA1; suprathreshold running trials only)  | 10 decoding iterations each                                                                | n-matched pseudopopulation of 340 cells from 8 vCA1 mice            | two-sided Mann-Whitney U, Bonferroni correction for n=2 | U = 10, p = 0.005, effect-size (r) = 0.68                   |
| ED Fig. 10d | comparison of Rew vs Sh and Sh vs CS- decoding accuracies during odor period (vCA1; suprathreshold running trials only)   | 10 decoding iterations each                                                                | n-matched pseudopopulation of 340 cells from 8 vCA1 mice            | two-sided Mann-Whitney U, Bonferroni correction for n=2 | U = 33.5, p = 0.34, effect-size (r) = 0.28                  |
| ED Fig. 10d | comparison of Rew vs CS- and Rew vs Sh decoding accuracies during odor period (vCA1; suprathreshold running trials only)  | 10 decoding iterations each                                                                | n-matched pseudopopulation of 340 cells from 8 vCA1 mice            | two-sided Mann-Whitney U, Bonferroni correction for n=2 | U = 90, p = 0.003, effect-size (r) = 0.68                   |
| ED Fig. 10d | comparison of Rew vs CS- and Sh vs CS- decoding accuracies during trace period (vCA1; suprathreshold running trials only) | 10 decoding iterations each                                                                | n-matched pseudopopulation of 340 cells from 8 vCA1 mice            | two-sided Mann-Whitney U, Bonferroni correction for n=2 | U = 100, p < 0.001, effect-size (r) = 0.85                  |
| ED Fig. 10d | comparison of Rew vs Sh and Sh vs CS- decoding accuracies during trace period (vCA1; suprathreshold running trials only)  | 10 decoding iterations each                                                                | n-matched pseudopopulation of 340 cells from 8 vCA1 mice            | two-sided Mann-Whitney U, Bonferroni correction for n=2 | U = 0, p < 0.001, effect-size (r) = 0.85                    |
| ED Fig. 10d | comparison of Rew vs CS- and Rew vs Sh decoding accuracies during trace period (vCA1; suprathreshold running trials only) | 10 decoding iterations each                                                                | n-matched pseudopopulation of 340 cells from 8 vCA1 mice            | two-sided Mann-Whitney U, Bonferroni correction for n=2 | U = 39.5, p = 0.56, effect-size (r) = 0.18                  |
| ED Fig. 10d | comparison of Rew vs CS- and Sh vs CS- decoding accuracies during odor period (dCA1; suprathreshold running trials only)  | 10 decoding iterations each                                                                | n-matched pseudopopulation of 340 cells from 4 dCA1 mice            | two-sided Mann-Whitney U, Bonferroni correction for n=2 | U = 27.5, p = 0.19, effect-size (r) = 0.38                  |
| ED Fig. 10d | comparison of Rew vs Sh and Sh vs CS- decoding accuracies during odor period (dCA1; suprathreshold running trials only)   | 10 decoding iterations each                                                                | n-matched pseudopopulation of 340 cells from 4 dCA1 mice            | two-sided Mann-Whitney U, Bonferroni correction for n=2 | U = 29, p = 0.23, effect-size (r) = 0.35                    |
| ED Fig. 10d | comparison of Rew vs CS- and Rew vs Sh decoding accuracies during odor period (dCA1; suprathreshold running trials only)  | 10 decoding iterations each                                                                | n-matched pseudopopulation of 340 cells from 4 dCA1 mice            | two-sided Mann-Whitney U, Bonferroni correction for n=2 | U = 83.5, p = 0.024, effect-size (r) = 0.57                 |
| ED Fig. 10d | comparison of Rew vs CS- and Sh vs CS- decoding accuracies during trace period (dCA1; suprathreshold running trials only) | 10 decoding iterations each                                                                | n-matched pseudopopulation of 340 cells from 4 dCA1 mice            | two-sided Mann-Whitney U, Bonferroni correction for n=2 | U = 74.5, p = 0.14, effect-size (r) = 0.41                  |
| ED Fig. 10d | comparison of Rew vs Sh and Sh vs CS- decoding accuracies during trace period (dCA1; suprathreshold running trials only)  | 10 decoding iterations each                                                                | n-matched pseudopopulation of 340 cells from 4 dCA1 mice            | two-sided Mann-Whitney U, Bonferroni correction for n=2 | U = 2, p < 0.001, effect-size (r) = 0.81                    |
| ED Fig. 10d | comparison of Rew vs CS- and Rew vs Sh decoding accuracies during trace period (dCA1; suprathreshold running trials only) | 10 decoding iterations each                                                                | n-matched pseudopopulation of 340 cells from 4 dCA1 mice            | two-sided Mann-Whitney U, Bonferroni correction for n=2 | U = 78.5, p = 0.068, effect-size (r) = 0.48                 |
| ED Fig. 10e | Late session linear regression of calcium activity and running velocity (4-7.5 sec post odor onset)                       | imaging sessions                                                                           | 11 vCA1, 5 dCA1                                                     | two-sided T-test                                        | t = 6.68, p < 0.001, effect-size (Cohen's d) = 3.38         |
| ED Fig. 10f | Late session speed decoding accuracy, vCA1 vs dCA1                                                                        | for each trial type, decoding accuracy for each 1 sec time bin spanning a 5 sec ITI period | 15 each region (3 trial types x 5 time bins)                        | two-sided Mann-Whitney U                                | U = 75.5, p = 0.13, effect-size (r) = 0.43                  |

| Figure      | Variable                                                   | Unit of Comparison                                                                         | n  | Test                                | Results                                   |
|-------------|------------------------------------------------------------|--------------------------------------------------------------------------------------------|----|-------------------------------------|-------------------------------------------|
| ED Fig. 10f | Late session speed decoding accuracy vs chance (50%), vCA1 | for each trial type, decoding accuracy for each 1 sec time bin spanning a 5 sec ITI period | 15 | two-sided Wilcoxon signed-rank test | W = 16, p = 0.012, effect-size (r) = 0.57 |
| ED Fig. 10f | Late session speed decoding accuracy vs chance (50%), dCA1 | for each trial type, decoding accuracy for each 1 sec time bin spanning a 5 sec ITI period | 15 | two-sided Wilcoxon signed-rank test | W = 2, p < 0.001, effect-size (r) = 0.81  |

|     |                                        |                               |     |
|-----|----------------------------------------|-------------------------------|-----|
| N/A | total cells registered across sessions | dCA1 2odor Early-Late         | 337 |
| N/A | total cells registered across sessions | dCA1 2odor Late-Reacquisition | 377 |
| N/A | total cells registered across sessions | vCA1 2odor Early-Late         | 241 |
| N/A | total cells registered across sessions | vCA1 2odor Late-Reacquisition | 253 |
| N/A | total cells registered across sessions | dCA1 4odor Pre-Late           | 503 |
| N/A | total cells registered across sessions | dCA1 4odor Late-Post          | 503 |
| N/A | total cells registered across sessions | vCA1 4odor Pre-Late           | 104 |
| N/A | total cells registered across sessions | vCA1 4odor Late-Post          | 104 |
| N/A | total cells registered across sessions | dCA1 3odor Late-Reversal Late | 281 |
| N/A | total cells registered across sessions | vCA1 3odor Late-Reversal Late | 392 |
